# Supplementary material for: TIGIT is Positively Associated with Advanced Human Glioma and Displays an Immunosuppressive Microenvironment
Source: Research Square preprint supplement (doi:10.21203/rs.3.rs-1530119/v1), 2022-04-11
Supplement: Supplementary file 1 [file 4c93a15b202babc92ce59b7a.docx]

**Sup. Table 1:** Differences between molecular subtypes of glioblastoma patients from the TCGA cohort depending on the expression of *TIGIT*

| *p* value | Classical | G-CIMP | Mesenchymal | Neural | Proneural |
| --- | --- | --- | --- | --- | --- |
| Classical | - | 0.9058 | 0.0043 | 0.0671 | 0.7176 |
| G-CIMP | 0.9058 | - | 0.0902 | 0.2996 | 0.9782 |
| Mesenchymal | 0.0043 | 0.0902 | - | 0.3193 | 0.0073 |
| Neural | 0.0671 | 0.2996 | 0.3193 | - | 0.0378 |
| Proneural | 0.7176 | 0.9782 | 0.0073 | 0.0378 | - |

*values in red indicate a statistical significant difference
